# Supplementary material for: Hydroxymethylated Phyllobilins: A Puzzling New Feature of the Dioxobilin Branch of Chlorophyll Breakdown
Source: PubMed Central journal article supplement (PMC4497322; doi:10.1002/chem.201303398), 2013-12-02
Supplement: chem0020-0087-sd1.pdf [file chem0020-0087-sd1.pdf]

# **CHEMISTRY**

---

## **A EUROPEAN JOURNAL**

---

### Supporting Information

© Copyright Wiley-VCH Verlag GmbH & Co. KGaA, 69451 Weinheim, 2013

#### **Hydroxymethylated Phyllobilins: A Puzzling New Feature of the Dioxobilin Branch of Chlorophyll Breakdown**

Iris Süßenbacher,<sup>[a]</sup> Bastien Christ,<sup>[b]</sup> Stefan Hörtensteiner,<sup>[b]</sup> and Bernhard Kräutler\*<sup>[a]</sup>

chem\_201303398\_sm\_miscellaneous\_information.pdf

## **Supporting Information**

## Materials and Methods

### Chemicals

HPLC-grade methanol (MeOH) and n-hexane were from *VWR* (Leuven, Belgium) and *Acros Organics* (Geel, Belgium). Potassium dihydrogen phosphate puriss. p.a, potassium phosphate dibasic-anhydrous puriss. p.a and ammonium acetate were from *Fluka* (Buchs, Switzerland). Ultrapure water ( $18 \text{ M}\Omega\text{cm}^{-1}$ ) was from a *Millipore* apparatus, 5g and 1g Sep-Pak-C18 Cartridges from *Water Associates* (Milford, USA).

### Plant Material

The *mes16-1* mutant of *Arabidopsis thaliana* [1] was grown on soil in a controlled growth chamber at 22°C and 60% relative humidity under short day conditions (8 h light/16 h dark) with fluorescent light of 60-120  $\mu\text{mol photons m}^{-2} \text{ s}^{-1}$ . For senescence induction, detached leaves from 8-week-old plants were incubated in darkness on wet filter paper for 4 d.

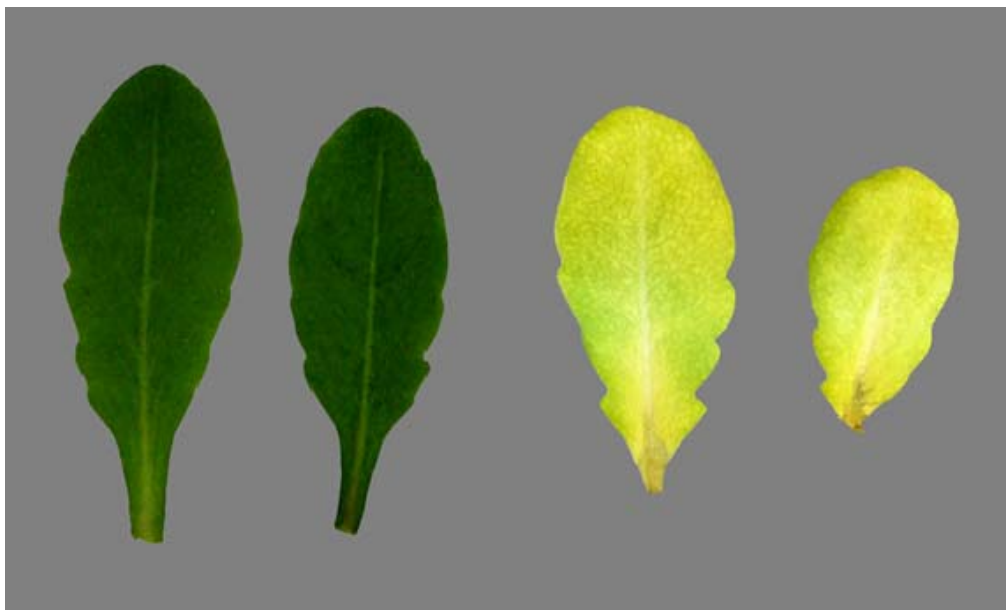

**Figure S1:** Pictures of green (left) and yellow senescent (right) *mes16-1* leaves collected after 4 d dark incubation.

### Chromatographic Methods

HPLC. *Hewlett Packard (hp)* series 1100 HPLC-system, online degasser, *Agilent* quaternary pump, diode array detector (DAD) and fluorescence detector (FLD). *Analytical HPLC:* Injection loop 200  $\mu\text{L}$  (*Rheodyne* valve); *Phenomenex hyperclone* ODS 5  $\mu\text{m}$  250 x 4.6 mm i.d. column (at room temperature) connected to *Phenomenex* ODS 4 x 3 mm i.d. pre-column

was used with a flow rate of 0.5 ml min<sup>-1</sup>. Solvent A: MeOH, solvent B: 10 mM ammonium acetate puffer standard solvent composition A/B: 0 – 5 min: 20/80; 5 – 55 min: 20/80 to 70/30; 55 – 60 min: 70/30 to 100/0; 60 – 70 min: 100/0; 70 – 75 min: 100/0 to 20/80. Preparative HPLC: Injection loop 1.2 ml; *Phenomenex hyperclone* ODS 5 µm 250 x 21.2 mm id. column (at room temperature) protected with a *Phenomenex* ODS 10 x 5 mm pre-column was used with a flow rate of 5 ml min<sup>-1</sup>. Data were collected and processed with *Agilent ChemStation*. Solvent A: MeOH, solvent B: 10 mM potassium phosphate buffer (pH 7); solvent composition A/B: 0 – 10 min: 20/80; 10 – 210 min: 20/80 to 55/45; 210 – 240 min: 55/45 to 63/37; 240 – 250 min: 63/37 to 100/0; 250 – 260 min: 100/0; 260 – 270 min: 100/0 to 20/80.

### Extraction and Isolation of Chlorophyll Catabolites

90 g (wet weight) of frozen, powdered yellow-greenish leaves of the *Arabidopsis thaliana mes16* mutant (kept in darkness for 4 days) were mixed with sea sand and extracted with 30 ml MeOH. The obtained slurry was filtrated through a Buchner funnel and the extraction with 10 ml MeOH was repeated 8 times. The collected green extract was diluted with 60 ml potassium phosphate buffer (50 mM, pH 7) and washed two times with 120 ml n-hexane. The solution was diluted with 600 ml of potassium phosphate buffer (50mM, pH 7) and filtrated. The mixture was loaded on a Sep-Pak Vac 20cc (5g) C18 cartridge, washed with water (50 ml) and eluted with MeOH (15 ml). The solvent was removed under reduced pressure on a rotary evaporator. The crude product was dissolved in 4 ml MeOH/potassium phosphate buffer (50:50 v/v) and portioned into 4 fraction of about 1 ml, which were centrifuged for 5 min at 13 000 rpm. The clear brown solution was injected into the preparative HPLC system. The relevant raw fractions from 6 runs were collected and analyzed by HPLC. Raw catabolite fractions, *At-mes16*-DNCC-38 (**3**), *At-mes16*-9HM-DNCC-44 (**4**), *At-mes16*-7HM-iso-DNCC-46 (**5**), *At-mes16*-DNCC-47 (**6**) and *At-mes16*-7HM-iso-DFCC (**7**) were diluted with water, concentrated on a Sep-Pak classic C18 cartridge and re-purified by means of analytical HPLC. The collected fractions of each catabolite were diluted with 4 volumes of water, applied to a Sep-Pak classic C18 cartridge, washed with 20 ml H<sub>2</sub>O and eluted with 5 ml MeOH. The solvents were removed in vacuum and analytically pure samples of *At-mes16*-DNCC-38 (**3**, 2.3 mg), *At-mes16*-9HM-DNCC-44 (**4**, 1.0 mg), *At-mes16*-7HM-iso-DNCC-46 (**5**, 1.0 mg), *At-mes16*-DNCC-47 (**6**, 0.7 mg) and *At-mes16*-7HM-iso-DFCC (**7**, 0.4 mg) were obtained.

## Spectroscopic Analysis of Chlorophyll Catabolites

General. Ultraviolet/visible (UV/Vis): *Hitachi U-3000* spectrophotometer, in MeOH;  $\lambda_{\max}$  [nm]( $\epsilon_{\text{rel}}$ ). *Circular dichroism (CD)*: *JASCO J715*, in MeOH;  $\lambda_{\text{min/max}}$  [nm],( $\Delta\epsilon$ ). *Nuclear magnetic resonance (NMR)*: *Bruker UltraShield 600 MHz Avance II+* or *Varian Unity Inova 500 MHz* spectrometers,  $^1\text{H-NMR}$  (in  $\text{CD}_3\text{OD}$ , at 285K,  $\delta(\text{C}^1\text{HD}_2\text{COD}) = 3.31$  ppm [2]; s, d, dd, t, m = singlet, doublet, double doublet, triplet, multiplet, assignment from  $^1\text{H}$ ,  $^1\text{H-COSY}$  and  $^1\text{H}$ ,  $^1\text{H-ROESY}$  spectra);  $^{13}\text{C-NMR}$  (in  $\text{CD}_3\text{OD}$ , at 285K,  $\delta(^{13}\text{CD}_3\text{OD}) = 49.0$  ppm [2], assignment of signals from  $^1\text{H}$ ,  $^{13}\text{C-HSQC}$  and  $^1\text{H}$ ,  $^{13}\text{C-HMBC}$  spectra) [3,4]. Electrospray ionization mass spectra (ESI-MS) [5]: *Finnigan LCQ classic*, ESI-source, positive ion mode, spray voltage 4.25 kV, solvent MeOH/H<sub>2</sub>O (10 mM NH<sub>4</sub>OAc) 1:1 (v/v), m/z (% intensity, type of ion), signals of isotopomeric ions are listed only for quasi molecular ions ( $[\text{M}+\text{H}]^+$ ). Atom numbering follows the convention of chlorophylls [6].

### UV-spectral data of four main nonfluorescent DCC-fractions

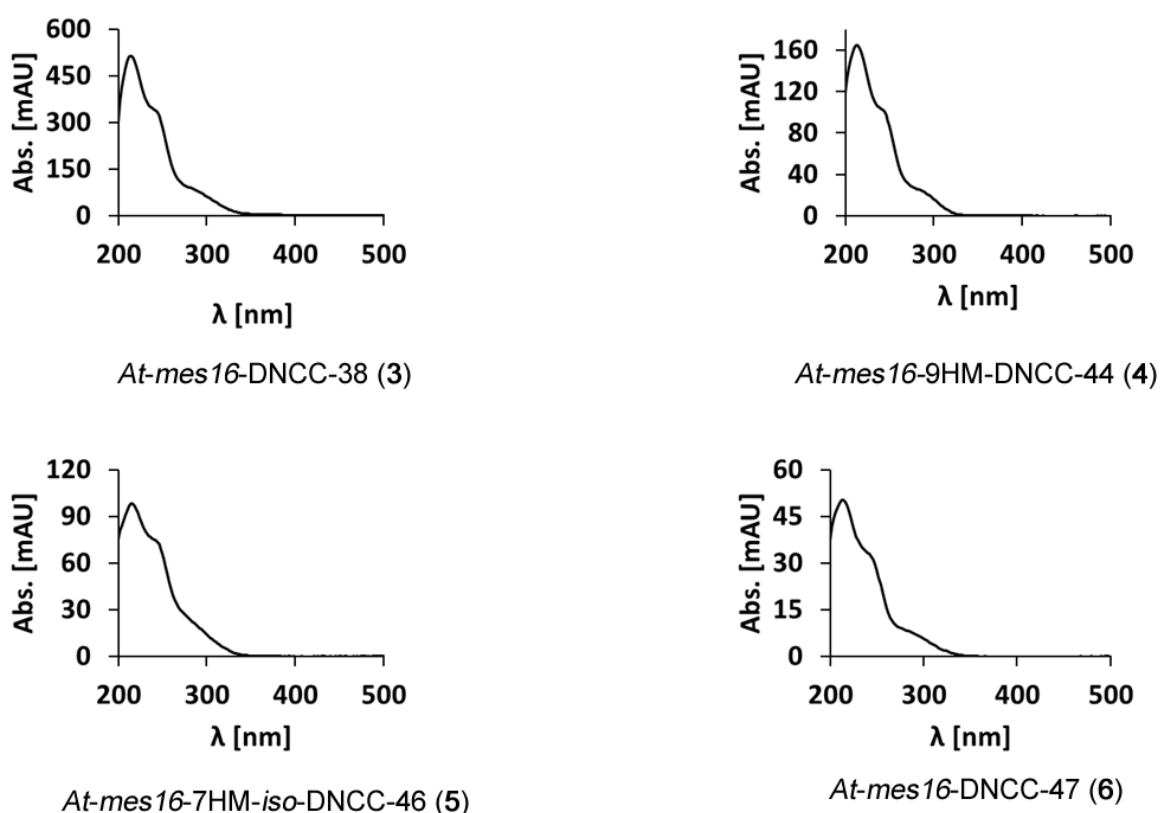

Figure S2. Online UV/Vis spectra of main nonfluorescent DCCs (*At-mes16-DNCC-38* (3), *At-mes16-9HM-DNCC-44* (4), *At-mes16-7HM-iso-DNCC-46* (5) and *At-mes16-DNCC-47*(6))

**Spectral data of *At-mes16*-DNCC-38 (3)**, a  $3^1,3^2$ -didehydro-8<sup>2</sup>-hydroxy-1,4,5,10,15,20,22,24-(9H,21H,23H)-octahydro-13<sup>2</sup>-methoxycarbonyl-4,5-seco-5-nor-4,6-dioxo-phytytoporphyrinate (see main text, Figure 4). UV/Vis ( $c = 3.2 \cdot 10^{-5}$  M):  $\lambda_{\max}$  ( $\epsilon_{\text{rel}}$ ) = 286 sh (0.17), 236 sh (1.00), 216 (1.44). CD ( $c = 3.2 \cdot 10^{-5}$  M):  $\lambda_{\text{min/max}}$  [nm] ( $\Delta\epsilon$ ) = 311 (3.7), 284 sh (-17.8), 252 sh (1.2), 228 (20.0), 205 (-22.9). NMR (see figure S3): 500 MHz <sup>1</sup>H-NMR:  $\delta$  [ppm] = 1.77 (s, H<sub>3</sub>C-7<sup>1</sup>), 1.96 (s, H<sub>3</sub>C-18<sup>1</sup>), 1.99 (s, H<sub>3</sub>C-2<sup>1</sup>), 2.11 (s, H<sub>3</sub>C-12<sup>1</sup>), 2.36 (m, H<sub>2</sub>C-17<sup>2</sup>), 2.45 (dd,  $J = 14.5/9.1$  Hz, H<sub>A</sub>C-20), 2.50 (m, H<sub>A</sub>C-8<sup>1</sup>), 2.54 (dd,  $J = 8.8/14.7$  Hz, H<sub>A</sub>C-10), 2.64 (m, H<sub>A</sub>C-17<sup>1</sup>), 2.72 (m, H<sub>B</sub>C-17<sup>1</sup>), 2.79 (m, H<sub>B</sub>C-8<sup>1</sup>), 2.91 (dd,  $J = 14.5/4.8$  Hz, H<sub>B</sub>C-20), 3.08 (dd,  $J = 14.8/4.6$  Hz, H<sub>B</sub>C-10), 3.70 (m, H<sub>2</sub>C-8<sup>2</sup>), 3.75 (s, H<sub>3</sub>C-13<sup>5</sup>), 4.09 (dd,  $J = 9.1/4.8$  Hz, HC-1), 4.35 (dd,  $J \sim 8.7/4.7$  Hz, HC-9), 4.93 (s, HC-15), 5.32 (dd,  $J = 11.8/2.0$  Hz, H<sub>A</sub>C-3<sup>2</sup>), 6.08 (dd,  $J = 17.8/2.0$  Hz, H<sub>B</sub>-3<sup>2</sup>), 6.44 (dd,  $J = 17.8/11.8$  Hz, HC-3<sup>1</sup>). 125 MHz <sup>13</sup>C-NMR:  $\delta$  [ppm] = 8.0 (7<sup>1</sup>), 8.9 (18<sup>1</sup>), 9.5 (12<sup>1</sup>), 12.1 (2<sup>1</sup>), 21.2 (17<sup>1</sup>), 30.0 (10), 30.2 (20), 31.0 (8<sup>1</sup>), 36.7 (15), 38.4 (17<sup>2</sup>), 52.3 (13<sup>5</sup>), 60.5 (9), 60.8 (8<sup>2</sup>), 61.3 (1), 67.5 (13<sup>2</sup>), 112.5 (12), 114.9 (18), 118.7 (3<sup>2</sup>), 120.3 (17), 123.9 (16), 124.2 (19), 125.6 (13), 126.9 (3<sup>1</sup>), 128.3 (3), 130.5 (7), 134.4 (11), 155.6 (8), 156.5 (2), 160.9 (14), 171.4 (13<sup>3</sup>), 174.2 (4), 176.2 (6), 180.0 (17<sup>3</sup>). ESI-MS:  $m/z$  (%) = 671.2 (17, [M+K]<sup>+</sup>); 655.2 (5, [M+Na]<sup>+</sup>); 635.1 (12), 634.1 (40), 633.1 (100, C<sub>34</sub>H<sub>41</sub>N<sub>4</sub>O<sub>8</sub><sup>+</sup>, [M+H]<sup>+</sup>); 601.0 (21, [M-CH<sub>4</sub>O+H]<sup>+</sup>); 510.0 (18, [M-C<sub>7</sub>H<sub>9</sub>NO (ring A)+H]<sup>+</sup>); 478.1 (5, [M-C<sub>8</sub>H<sub>13</sub>NO<sub>2</sub> + H]<sup>+</sup>).

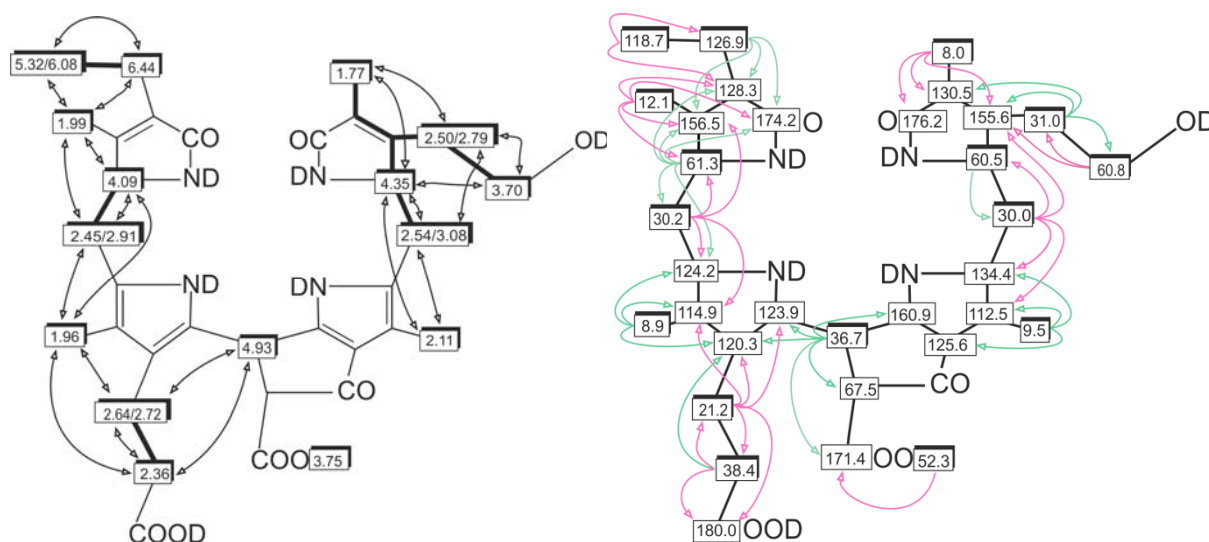

**Figure S3.** Graphical structural analysis of *At-mes16*-DNCC-38 (3). Left. <sup>1</sup>H-chemical shift assignments from <sup>1</sup>H,<sup>1</sup>H-ROESY and COSY correlations (arrows or bold bonds, resp.). Right. <sup>13</sup>C chemical shift assignments from <sup>1</sup>H,<sup>13</sup>C-HSQC correlations are shown by shaded boxes, and arrows indicate <sup>1</sup>H,<sup>13</sup>C-HMBC long range correlations.

Spectral data of *At-mes16*-9HM-DNCC-44 (4), a 3<sup>1</sup>,3<sup>2</sup>-didehydro-9-hydroxymethyl-1,4,5,10,15,20,22,24-(9H,21H,23H)-octahydro-13<sup>2</sup>-methoxycarbonyl-4,5-seco-5-nor-4,6-dioxo-phytoporphyrinate (see main text, Figure 4). UV/Vis ( $c = 3.8 \cdot 10^{-5}$  M):  $\lambda_{\max}$  ( $\epsilon_{\text{rel}}$ ) = 294 sh (0.12), 238 sh (1.00), 216 (1.50). CD ( $c = 3.8 \cdot 10^{-5}$  M):  $\lambda_{\min/\max}$  [nm] ( $\Delta\epsilon$ ) = 310 (4.7), 284 (-16.3), 252 sh (2.5), 225 (26.8), 207 (-37.4). NMR (see Figure S4) 600 MHz <sup>1</sup>H-NMR:  $\delta$  [ppm] = 1.15 (t,  $J = 7.7$  Hz, H<sub>3</sub>C-8<sup>2</sup>), 1.74 (s, H<sub>3</sub>C-7<sup>1</sup>), 1.97 (s, H<sub>3</sub>C-18<sup>1</sup>), 2.02 (s, H<sub>3</sub>C-2<sup>1</sup>), 2.05 (s, H<sub>3</sub>C-12<sup>1</sup>), 2.38 (m, H<sub>2</sub>C-17<sup>2</sup>), 2.42 (m, H<sub>A</sub>C-8<sup>1</sup>), 2.45 (dd,  $J = 14.5/9.3$  Hz, H<sub>A</sub>C-20), 2.50 (m, H<sub>B</sub>C-8<sup>1</sup>), 2.65 (m, H<sub>A</sub>C-17<sup>1</sup>), 2.71 (m, H<sub>B</sub>C-17<sup>1</sup>), 2.80/3.06 (AB-system,  $J = 15.2$  Hz, H<sub>2</sub>C-10), 2.99 (dd,  $J = 14.5/4.6$  Hz, H<sub>B</sub>C-20), 3.66/3.69 (AB-system,  $J = 11.3$  Hz, H<sub>2</sub>C-9<sup>1</sup>), 3.74 (s, H<sub>3</sub>C-13<sup>5</sup>), 4.13 (dd,  $J = 9.3/4.6$  Hz, HC-1), 4.92 (s, HC-15), 5.33 (dd,  $J = 11.7/2.3$  Hz, H<sub>A</sub>C-3<sup>2</sup>), 6.10 (dd,  $J = 17.7/2.3$  Hz, H<sub>B</sub>C-3<sup>2</sup>), 6.45 (dd,  $J = 17.7/11.7$  Hz, HC-3<sup>1</sup>). 150 MHz <sup>13</sup>C-NMR:  $\delta$  [ppm] = 8.3 (7<sup>1</sup>), 9.2 (18<sup>1</sup>), 9.6 (12<sup>1</sup>), 12.4 (2<sup>1</sup>), 12.6 (8<sup>2</sup>), 20.0 (8<sup>1</sup>), 21.2 (17<sup>1</sup>), 30.2 (20), 30.4 (10), 37.1 (15), 38.3 (17<sup>2</sup>), 52.6 (13<sup>5</sup>), 61.7 (1), 64.6 (9<sup>1</sup>), 67.6 (13<sup>2</sup>), 70.2 (9), 113.6 (12), 115.0 (18), 118.8 (3<sup>2</sup>), 120.3 (17), 123.8 (16), 124.2 (19), 125.4 (13), 126.8 (3<sup>1</sup>), 128.4 (3), 130.1 (7), 132.8 (11), 156.6 (2), 160.6 (8), 160.9 (14), 171.4 (13<sup>3</sup>), 174.6 (4), 176.0 (6), 179.6 (17<sup>3</sup>). ESI-MS:  $m/z$  (%) = 685.27 (26, [M+K]<sup>+</sup>); 669.27 (66, [M+Na]<sup>+</sup>); 649.1 (13), 648.1 (38), 647.0 (100, C<sub>35</sub>H<sub>43</sub>N<sub>4</sub>O<sub>8</sub><sup>+</sup>, [M+H]<sup>+</sup>); 615.1 (19, [M-CH<sub>4</sub>O+H]<sup>+</sup>); 524.0 (9, [M-C<sub>7</sub>H<sub>9</sub>NO+H]<sup>+</sup>); 492.2 (5, [M-C<sub>8</sub>H<sub>13</sub>NO<sub>2</sub>+H]<sup>+</sup>); 460.13 (3, [M-C<sub>9</sub>H<sub>17</sub>NO<sub>3</sub> + H]<sup>+</sup>); 369.20 (3, [M-C<sub>14</sub>H<sub>20</sub>N<sub>2</sub>O<sub>3</sub>+H]<sup>+</sup>).

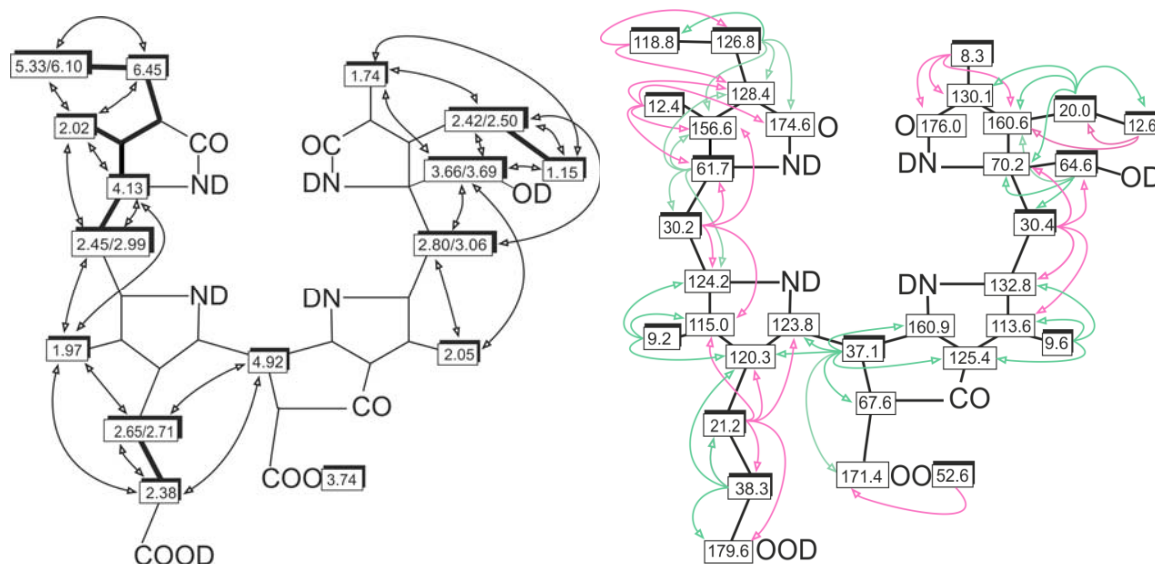

**Figure S4.** Graphical structural analysis of *At-mes16*-9HM-DNCC-44 (4). Left. <sup>1</sup>H-chemical shift assignments from <sup>1</sup>H,<sup>1</sup>H-ROESY and COSY correlations (arrows or bold bonds, resp.). Right. <sup>13</sup>C chemical shift assignments from <sup>1</sup>H,<sup>13</sup>C-HSQC correlations are shown by shaded boxes, and arrows indicate <sup>1</sup>H,<sup>13</sup>C-HMBC long range correlations.

Spectral data of *At-mes16*-7HM-*iso*-DNCC-46 (5), 3<sup>1</sup>,3<sup>2</sup>-didehydro-7-hydroxymethyl-1,4,5,10,15,20,22,24-(7H,21H,23H)-octahydro-13<sup>2</sup>-methoxycarbonyl-4,5-*seco*-5-nor-4,6-dioxo-phytoporphyrinate (see main text, Figure 4). UV/Vis ( $c = 3.8 \cdot 10^{-5}$  M):  $\lambda_{\max}$  ( $\epsilon_{\text{rel}}$ ) = 284 sh (0.32), 238 sh (1.00), 216 (1.30). CD ( $c = 3.8 \cdot 10^{-5}$  M):  $\lambda_{\text{min/max}}$  [nm] ( $\Delta\epsilon$ ) = 312 (3.1), 284 (-12.9), 252 (5.5), 226 (18.9), 207 (-17.4). NMR (see Figure S5): 600 MHz <sup>1</sup>H-NMR:  $\delta$  [ppm] = 1.06 (s, H<sub>3</sub>C-7<sup>1</sup>), 1.07 (t,  $J = 7.6$  Hz, H<sub>3</sub>C-8<sup>2</sup>), 1.94 (s, H<sub>3</sub>C-18<sup>1</sup>), 1.96 (s, H<sub>3</sub>C-2<sup>1</sup>), 2.14 (s, H<sub>3</sub>C-12<sup>1</sup>), 2.20 (m, H<sub>A</sub>C-8<sup>1</sup>), 2.26 (m, H<sub>B</sub>C-8<sup>1</sup>), 2.33 (m, H<sub>2</sub>C-17<sup>2</sup>), 2.52 (dd,  $J = 14.6/8.6$  Hz, H<sub>A</sub>C-20), 2.63 (m, H<sub>A</sub>C-17<sup>1</sup>), 2.67 (m, H<sub>B</sub>C-17<sup>1</sup>), 2.85 (dd,  $J = 14.6/5.2$  Hz, H<sub>B</sub>C-20), 3.57/3.66 (AB-system,  $J = 17.2$  Hz, H<sub>2</sub>C-10), 3.60/3.63 (AB-system,  $J = 11.4$  Hz, H<sub>2</sub>C-7<sup>1</sup>), 3.74 (s, H<sub>3</sub>C-13<sup>5</sup>), 4.10 (dd,  $J = 8.6/5.2$  Hz, HC-1), 4.86 (s, HC-15), 5.34 (dd,  $J = 11.7/2.2$  Hz, H<sub>A</sub>C-3<sup>2</sup>), 6.11 (dd,  $J = 17.6/2.3$  Hz, H<sub>B</sub>C-3<sup>2</sup>), 6.45 (dd,  $J = 17.7/11.6$  Hz, HC-3<sup>1</sup>). 150 MHz <sup>13</sup>C-NMR:  $\delta$  [ppm] = 9.1 (12<sup>1</sup>), 9.1 (18<sup>1</sup>), 12.3 (2<sup>1</sup>), 15.0 (8<sup>2</sup>), 17.6 (8<sup>1</sup>), 17.7 (7<sup>1</sup>), 21.4 (17<sup>1</sup>), 23.1 (10), 30.0 (20), 37.2 (15), 38.4 (17<sup>2</sup>), 52.6 (13<sup>5</sup>), 55.5 (7), 61.4 (1), 65.9 (7<sup>1</sup>), 67.5 (13<sup>2</sup>), 111.9 (12), 115.0 (18), 118.8 (3<sup>2</sup>), 119.9 (17), 122.9 (8), 123.8 (16), 123.9 (19), 125.6 (13), 126.7 (3<sup>1</sup>), 128.2 (3), 132.5 (9), 132.7 (11), 156.5 (2), 160.2 (14), 171.3 (13<sup>3</sup>), 174.3 (4), 179.4 (17<sup>3</sup>), 184.5 (6). ESI-MS:  $m/z$  (%) = 685.1 (21, [M+K]<sup>+</sup>); 669.1 (6, [M+Na]<sup>+</sup>); 649.1 (13), 648.1 (41), 647.0 (100, C<sub>35</sub>H<sub>43</sub>N<sub>4</sub>O<sub>8</sub><sup>+</sup>, [M+H]<sup>+</sup>); 617.0 (20, [M-CH<sub>2</sub>O+H]<sup>+</sup>); 615.1 (12, [M-CH<sub>4</sub>O+H]<sup>+</sup>); 585.2 (14, [M-C<sub>2</sub>H<sub>6</sub>O<sub>2</sub>+H]<sup>+</sup>); 524.1 (5, [M-C<sub>7</sub>H<sub>9</sub>NO+H]<sup>+</sup>); 492.1 (5, [M-C<sub>8</sub>H<sub>13</sub>NO<sub>2</sub>+H]<sup>+</sup>).

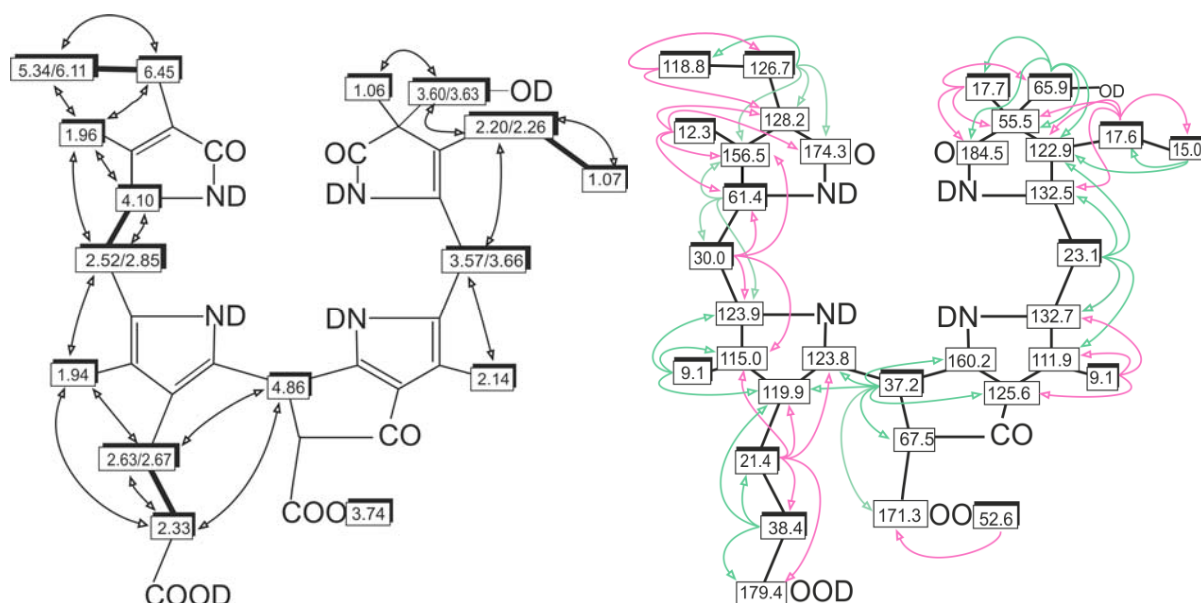

**Figure S5.** Graphical structural analysis of *At-mes16*-7HM-*iso*-DNCC-46 (5). Left. <sup>1</sup>H-chemical shift assignments from <sup>1</sup>H,<sup>1</sup>H-ROESY and COSY correlations (arrows or bold bonds, resp.). Right. <sup>13</sup>C chemical shift assignments from <sup>1</sup>H,<sup>13</sup>C-HSQC correlations are shown by shaded boxes, and arrows indicate <sup>1</sup>H,<sup>13</sup>C-HMBC long range correlations.



Spectral data of *At-mes16*-DNCC-47 (6), 3<sup>1</sup>,3<sup>2</sup>-didehydro-1,4,5,10,15,20,22,24-(9H, 21H,23H)-octahydro-13<sup>2</sup>-methoxycarbonyl-4,5-seco-5-nor-4,6-dioxo-phytoporphyrinate (see main text, Figure 4). UV/Vis ( $c = 3.2 \cdot 10^{-5}$  M):  $\lambda_{\max}$  ( $\epsilon_{\text{rel}}$ ) = 294 sh (0.23), 242 sh (1.00), 219 (1.36). CD ( $c = 3.2 \cdot 10^{-5}$  M):  $\lambda_{\text{min/max}}$  [nm] ( $\Delta\epsilon$ ) = 310 (1.32), 284 (-5.00), 255 sh (0.85), 228 (5.93), 206 (-7.44). NMR (see figure S6): 600 MHz <sup>1</sup>H-NMR:  $\delta$  [ppm] = 1.13 (t,  $J = 7.6$  Hz, H<sub>3</sub>C-8<sup>2</sup>), 1.75 (s, H<sub>3</sub>C-7<sup>1</sup>), 1.96 (s, H<sub>3</sub>C-18<sup>1</sup>), 1.99 (s, H<sub>3</sub>C-2<sup>1</sup>), 2.11 (s, H<sub>3</sub>C-12<sup>1</sup>), 2.35 (m, H<sub>A</sub>C-8<sup>1</sup>), 2.36 (m, H<sub>2</sub>C-17<sup>2</sup>), 2.47 (dd,  $J = 14.5/9.2$  Hz, H<sub>A</sub>C-20), 2.51 (dd,  $J = 8.9/14.8$  Hz, H<sub>A</sub>C-10), 2.59 (m, H<sub>B</sub>C-8<sup>1</sup>), 2.66 (m, H<sub>A</sub>C-17<sup>1</sup>), 2.72 (m, H<sub>B</sub>C-17<sup>1</sup>), 2.90 (dd,  $J = 14.5/4.9$  Hz, H<sub>B</sub>C-20), 3.08 (dd,  $J = 14.8/4.3$  Hz, H<sub>B</sub>C-10), 3.75 (s, H<sub>3</sub>C-13<sup>5</sup>), 4.10 (dd,  $J = 9.1/4.9$  Hz, HC-1), 4.30 (dd,  $J = 8.9/4.3$  Hz, HC-9), 4.93 (s, HC-15), 5.33 (dd,  $J = 11.7/2.3$  Hz, H<sub>A</sub>C-3<sup>2</sup>), 6.08 (dd,  $J = 17.7/2.3$  Hz, H<sub>B</sub>C-3<sup>2</sup>), 6.45 (dd,  $J = 17.8/11.6$  Hz, HC-3<sup>1</sup>). 150 MHz <sup>13</sup>C-NMR (only HSQC):  $\delta$  [ppm] = 8.1 (7<sup>1</sup>), 9.2 (18<sup>1</sup>), 9.3 (12<sup>1</sup>), 12.4 (2<sup>1</sup>), 13.1 (8<sup>2</sup>), 20.5 (8<sup>1</sup>), 21.6 (17<sup>1</sup>), 29.8 (10), 30.2 (20), 37.2 (15), 38.9 (17<sup>2</sup>), 52.6 (13<sup>5</sup>), 59.6 (9), 61.5 (1), 118.9 (3<sup>2</sup>), 126.8 (3<sup>1</sup>). ESI-MS:  $m/z$  (%) = 655.2(29, [M+K]<sup>+</sup>); 639.2 (11, [M+Na]<sup>+</sup>); 619.1 (11); 618.1 (39), 617.2 (100, C<sub>34</sub>H<sub>41</sub>N<sub>4</sub>O<sub>7</sub><sup>+</sup>, [M+H]<sup>+</sup>); 585.1 (26, [M-CH<sub>4</sub>O+H]<sup>+</sup>); 494.1 (11, [M-C<sub>7</sub>H<sub>9</sub>NO (ring A)+H]<sup>+</sup>); 462.1 (7, [M-C<sub>8</sub>H<sub>13</sub>NO<sub>2</sub>+H]<sup>+</sup>).

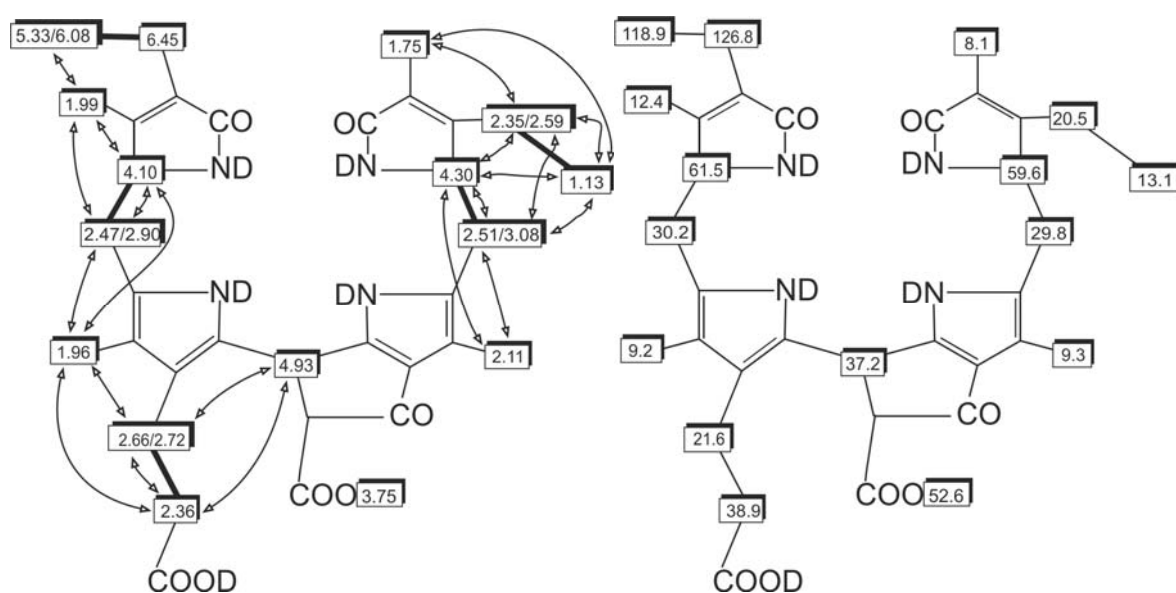

**Figure S6.** Graphical structural analysis of *At-mes16*-DNCC-47 (6). Left. <sup>1</sup>H-chemical shift assignments from <sup>1</sup>H,<sup>1</sup>H-ROESY correlations (shown by arrows) and COSY correlations (indicate by bold bonds). Right. <sup>13</sup>C chemical shift assignments from <sup>1</sup>H,<sup>13</sup>C-HSQC correlations are shown by shaded boxes.

**Spectral data of *At-mes16-7HM-iso-dFCC* (7):**  $3^1,3^2$ -didehydro-7-hydroxymethyl-1,4,5,10,17,18,20,22-(7H,21H,23H)-octahydro-13<sup>2</sup>-methoxycarbonyl-4,5-seco-5-nor-4,6-dioxo-phytoporphyrinate (Figure 4). UV/Vis ( $c = 1.8 \cdot 10^{-5}$  M):  $\lambda_{\max}$  ( $\epsilon_{\text{rel}}$ ) = 358 (1.00), 222 (2.14). CD ( $c = 1.8 \cdot 10^{-5}$  M):  $\lambda_{\min/\max}$  [nm] ( $\Delta\epsilon$ ) = 356 (7.77), 320 (2.54), 304 (4.68), 280 (2.4), 255 (5.50), 214 (-15.5). NMR (see Figure S7): 600 MHz  $^1\text{H}$ -NMR:  $\delta$  [ppm] = 1.05 (s,  $\text{H}_3\text{C}-7^1$ ), 1.07 (t,  $J = 7.6$  Hz,  $\text{H}_3\text{C}-8^2$ ), 1.13 (d,  $J = 7.3$  Hz,  $\text{H}_3\text{C}-18^1$ ), 1.63 (m,  $\text{H}_\text{A}\text{C}-17^1$ ), 1.94 (m,  $\text{H}_\text{B}\text{C}-17^1$ ), 2.11 (s,  $\text{H}_3\text{C}-2^1$ ), 2.16 (s,  $\text{H}_3\text{C}-12^1$ ), 2.20 (m,  $\text{H}_2\text{C}-17^2$ ), 2.23 (m,  $\text{H}_2\text{C}-8^1$ ), 2.42 (m, HC-17), 2.65 (dd,  $J = 17.8/8.8$  Hz,  $\text{H}_\text{A}\text{C}-20$ ), 2.73 (m, HC-18), 3.05 (dd,  $J = 17.8/3.6$  Hz,  $\text{H}_\text{B}\text{C}-20$ ), 3.62/3.64 (AB-system,  $J = 12.3$ ,  $\text{H}_2\text{C}-7^1$ ), 3.68/3.72 (AB-system,  $J = 16.8$ ,  $\text{H}_2\text{C}-10$ ), 3.74 (s,  $\text{H}_3\text{C}-13^5$ ), 4.68 (dd,  $J = 8.8/3.6$  Hz, HC-1), 5.37 (dd,  $J = 11.7/2.2$  Hz,  $\text{H}_\text{A}\text{C}-3^2$ ), 6.18 (dd,  $J = 17.6/2.3$  Hz,  $\text{H}_\text{B}\text{C}-3^2$ ), 6.50 (dd,  $J = 17.7/11.6$  Hz, HC-3<sup>1</sup>); 150 MHz  $^{13}\text{C}$ -NMR:  $\delta$  [ppm] = 8.9 (12<sup>1</sup>), 12.4 (2<sup>1</sup>), 15.2 (8<sup>2</sup>), 17.6 (8<sup>1</sup>), 17.7 (7<sup>1</sup>), 17.9 (18<sup>1</sup>), 23.0 (10), 29.4 (17<sup>1</sup>), 33.0 (17<sup>2</sup>), 34.6 (20), 48.0 (17), 51.5 (18), 52.7 (13<sup>5</sup>), 56.3 (7), 58.5 (1), 65.9 (7<sup>1</sup>), 113.3 (12), 119.2 (3<sup>2</sup>), 123.8 (8), 127.1 (13), 126.9 (3<sup>1</sup>), 129.1 (3), 132.8 (9), 135.1 (11), 156.6 (2), 170.5 (13<sup>3</sup>), 175.3 (4), 179.4 (17<sup>3</sup>), 185.1 (6), 186.5 (19). ESI-MS:  $m/z$  (% intensity, type of ion) = 685.1 (22,  $[\text{M}+\text{K}]^+$ ); 669.2 (14,  $[\text{M}+\text{Na}]^+$ ); 649.1 (18), 648.2 (49), 647.2 (100,  $\text{C}_{35}\text{H}_{43}\text{N}_4\text{O}_8^+$ ,  $[\text{M}+\text{H}]^+$ ); 617.2 (22,  $[\text{M}-\text{CH}_2\text{O}+\text{H}]^+$ ); 615.0 (17,  $[\text{M}-\text{CH}_4\text{O}+\text{H}]^+$ ); 585.20 (12,  $[\text{M}-\text{C}_2\text{H}_6\text{O}_2+\text{H}]^+$ ); 494.13 (10,  $[\text{M}-\text{C}_8\text{H}_{11}\text{NO}_2+\text{H}]^+$ ); 492.13 (10,  $[\text{M}-\text{C}_8\text{H}_{13}\text{NO}_2+\text{H}]^+$ ).

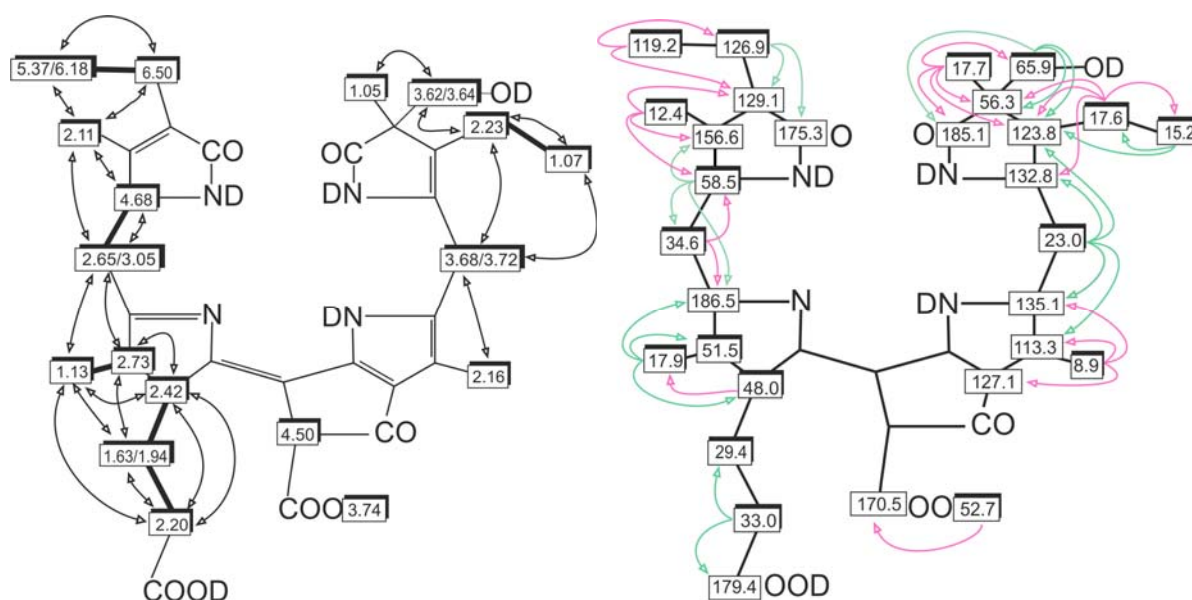

**Figure S7.** Graphical structural analysis of *At-mes16-7HM-iso-dFCC* (7). Left.  $^1\text{H}$ -chemical shift assignments from  $^1\text{H}$ ,  $^1\text{H}$ -ROESY and COSY correlations (arrows or bold bonds, resp.). Right.  $^{13}\text{C}$  chemical shift assignments from  $^1\text{H}$ ,  $^{13}\text{C}$ -HSQC correlations are shown by shaded boxes, and arrows indicate  $^1\text{H}$ ,  $^{13}\text{C}$ -HMBC long range correlations.

UV- and mass spectral (on-line data) of three minor DNCC-fractions (see Figure 2, main text)

*At-mes16*-DNCC-37 (8): UV/Vis:  $\lambda_{\max}$  ( $\epsilon_{\text{rel}}$ ) = 290 sh (0.21), 242 sh (1.00), 212 (1.60). ESI-MS: m/z (% intensity, type of ion) = 671.2 (20, [M+K]<sup>+</sup>); 655.2 (6, [M+Na]<sup>+</sup>); 635.2 (12), 634.2 (41), 633.2 (100, C<sub>34</sub>H<sub>41</sub>N<sub>4</sub>O<sub>8</sub><sup>+</sup>, [M+H]<sup>+</sup>); 601.1 (7, [M-CH<sub>4</sub>O+H]<sup>+</sup>); 510.2 (35, [M-C<sub>7</sub>H<sub>9</sub>NO (ring A)+H]<sup>+</sup>). *At-mes16*-DNCC-40 (9): UV/Vis:  $\lambda_{\max}$  ( $\epsilon_{\text{rel}}$ ) = 290 sh (0.21), 242 sh (1.00), 214 (1.59). ESI-MS: m/z (% intensity, type of ion) = 671.2 (28, [M+K]<sup>+</sup>); 655.2 (11, [M+Na]<sup>+</sup>); 635.2 (14), 634.2 (40), 633.2 (100, C<sub>34</sub>H<sub>41</sub>N<sub>4</sub>O<sub>8</sub><sup>+</sup>, [M+H]<sup>+</sup>); 601.2(28, [M-CH<sub>4</sub>O+H]<sup>+</sup>); 510.2 (11, [M-C<sub>7</sub>H<sub>9</sub>NO (ring A)+H]<sup>+</sup>); 478.1 (6, [M-C<sub>8</sub>H<sub>13</sub>NO<sub>2</sub>+H]<sup>+</sup>). *At-mes16*-DNCC-42 (10): UV/Vis:  $\lambda_{\max}$  ( $\epsilon_{\text{rel}}$ ) = 290 sh (0.28), 242 sh (1.00), 214 (1.34). ESI-MS: m/z (% intensity, type of ion) = 671.1 (30, [M+K]<sup>+</sup>); 655.2 (14, [M+Na]<sup>+</sup>); 635.1 (11), 634.1 (37), 633.1 (100, C<sub>34</sub>H<sub>41</sub>N<sub>4</sub>O<sub>8</sub><sup>+</sup>, [M+H]<sup>+</sup>); 601.0 (23, [M-CH<sub>4</sub>O+H]<sup>+</sup>); 510.0 (12, [M-C<sub>7</sub>H<sub>9</sub>NO (ring A)+H]<sup>+</sup>); 478.1 (6, [M-C<sub>8</sub>H<sub>13</sub>NO<sub>2</sub>+H]<sup>+</sup>).

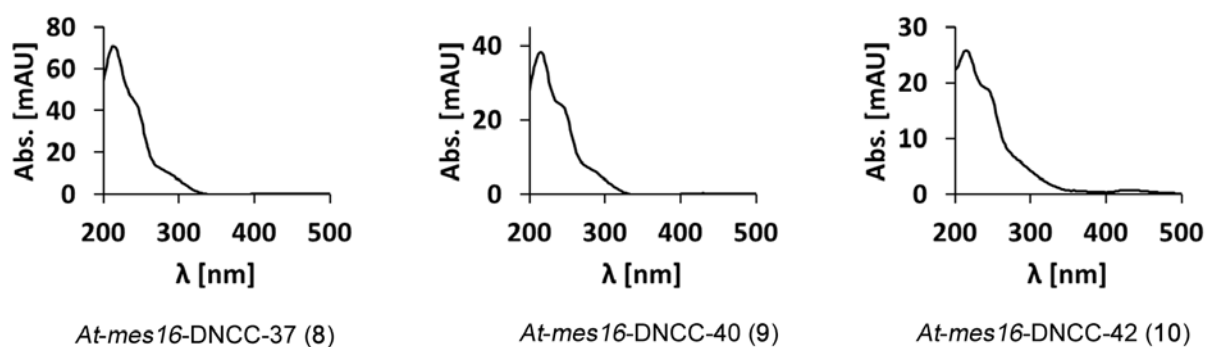

**Figure S8.** Online UV/Vis spectra of three minor DNCC-fractions, which are all isomers of the major catabolite *At-mes16*-DNCC-38 (3)

## References

- [1] Christ, B., Schelbert, S., Aubry, S., Süssenbacher, I., Müller, T., Kräutler, B. and Hörtensteiner, S. (2012) *Plant Physiol.* 158, 628-641.
- [2] Gottlieb, H.E., Kotlyar, V. and Nudelman, A. (1997) *J. Org. Chem.* 62, 7512-7515.
- [3] Ernst, R.R., Bodenhausen, G. and Wokaun, A. (1987), *Principles of Nuclear Magnetic Resonance in One & Two Dimensions*, Clarendon Press, Oxford.
- [4] Kessler, H., Gehrke, M. and Griesinger, C. (1988) *Angew Chem Int Ed* 27, 490-536.
- [5] Fenn, J.B., Mann, M., Meng, C.K., Wong, S.F. and Whitehouse, C.M. (1989) *Science* 246, 64-71.
- [6] Scheer, H., (2006) in: *Chlorophylls and Bacteriochlorophylls - Biochemistry, Biophysics, Functions and Applications* (Grimm, B., Porra, R., Rüdiger, W. and Scheer, H., Eds.), *Adv. Photosynth. Res.* Vol. 25, pp.1-26, Springer, Dordrecht, The Netherlands.
